# Supplementary material for: Deep whole genome sequencing identifies recurrent genomic alterations in commonly used breast cancer cell lines and patient-derived xenograft models
Source: PubMed Central journal article supplement (PMC9509640; doi:10.1186/s13058-022-01540-0), 2022-09-24

Figure S1

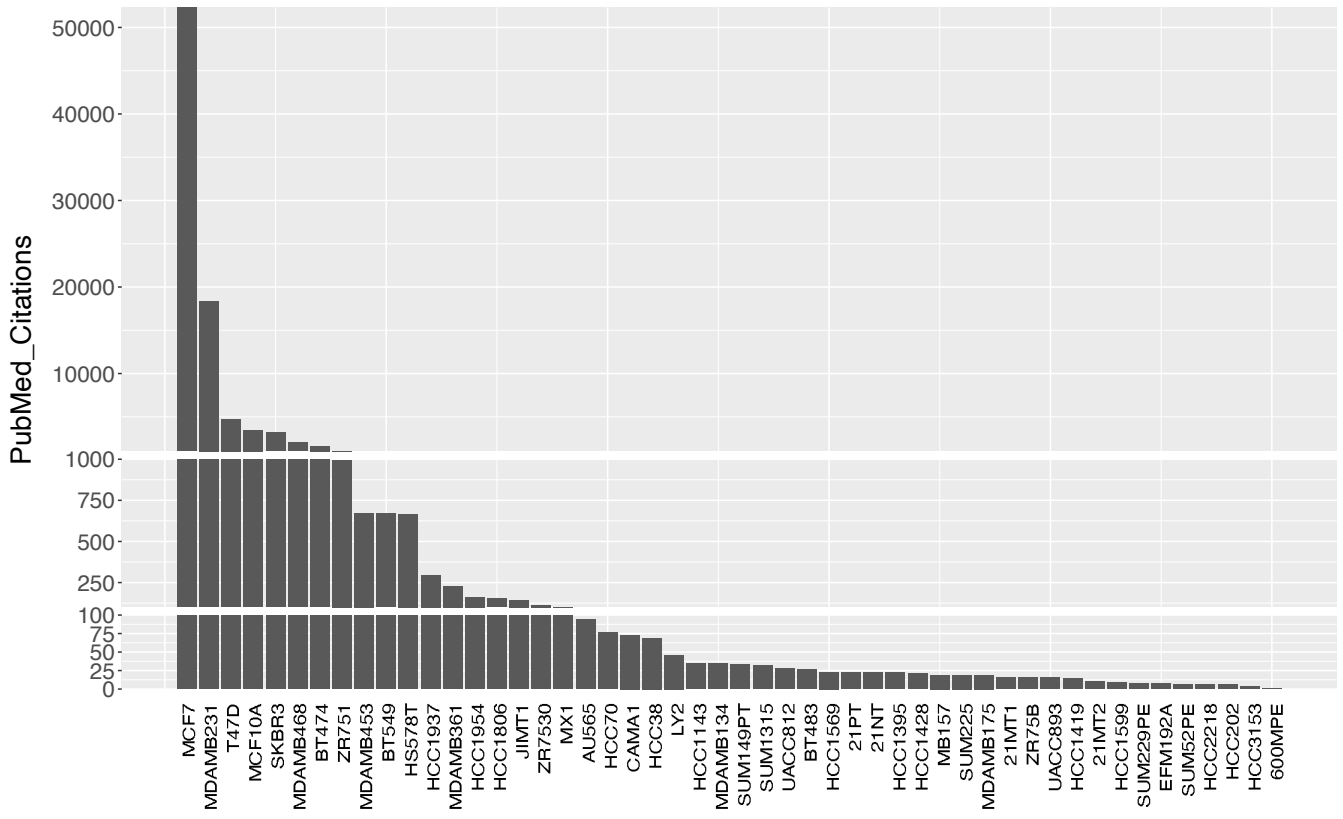

Figure S2

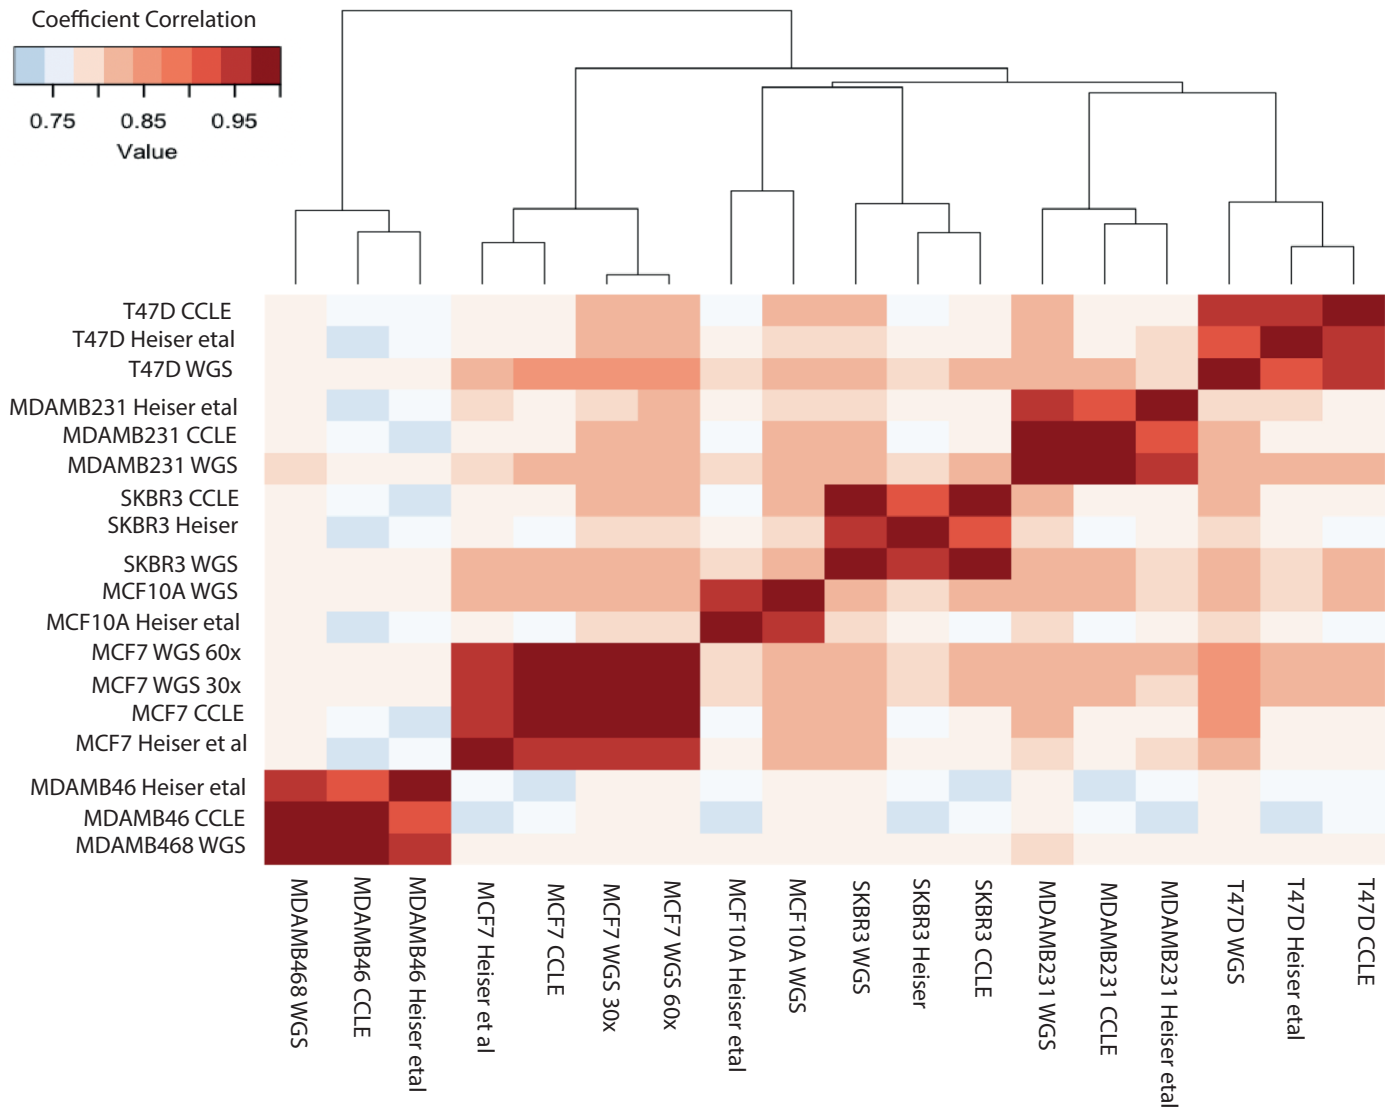

Figure S3

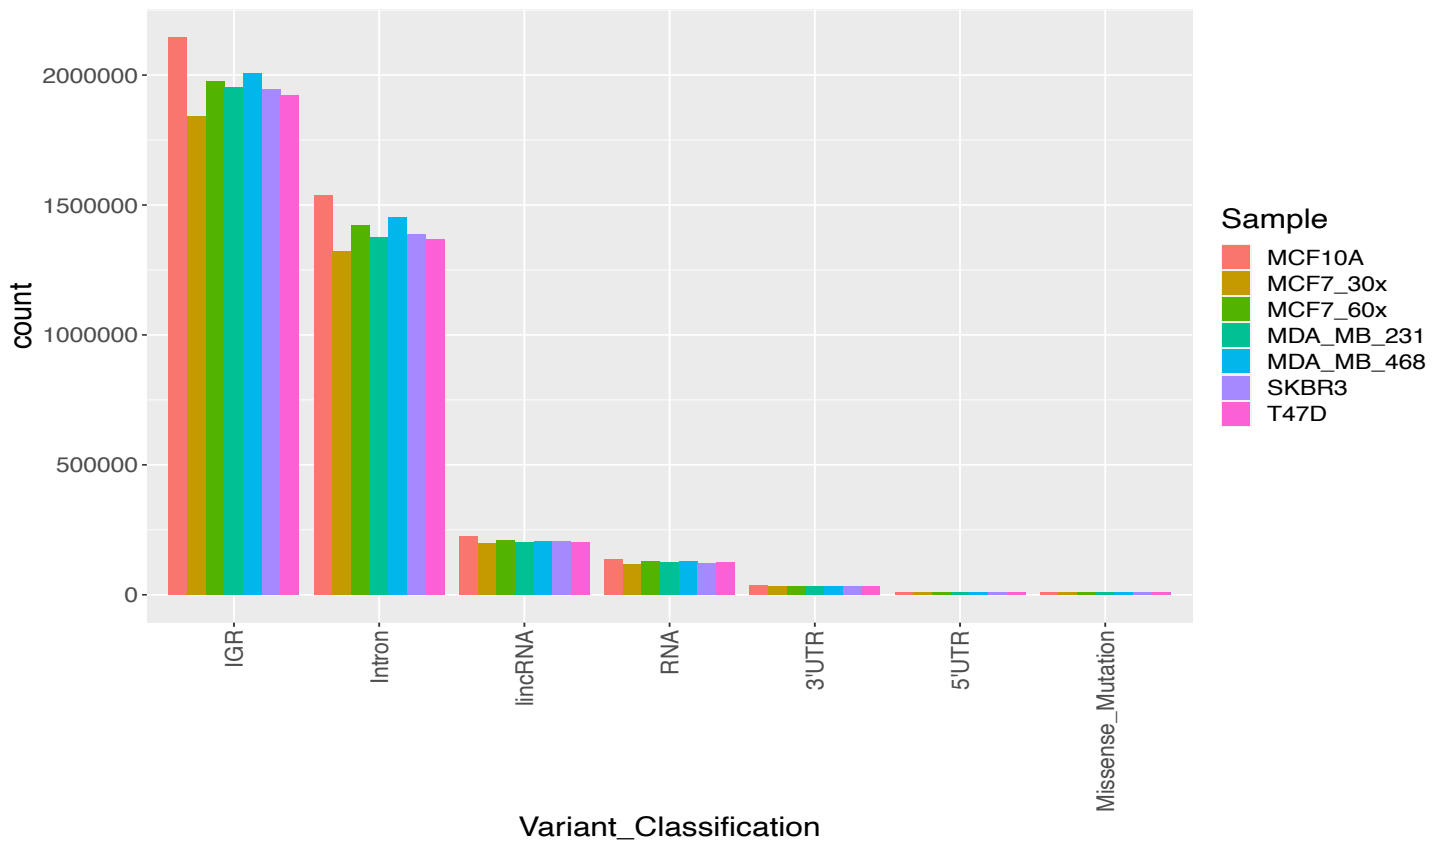

Figure S4

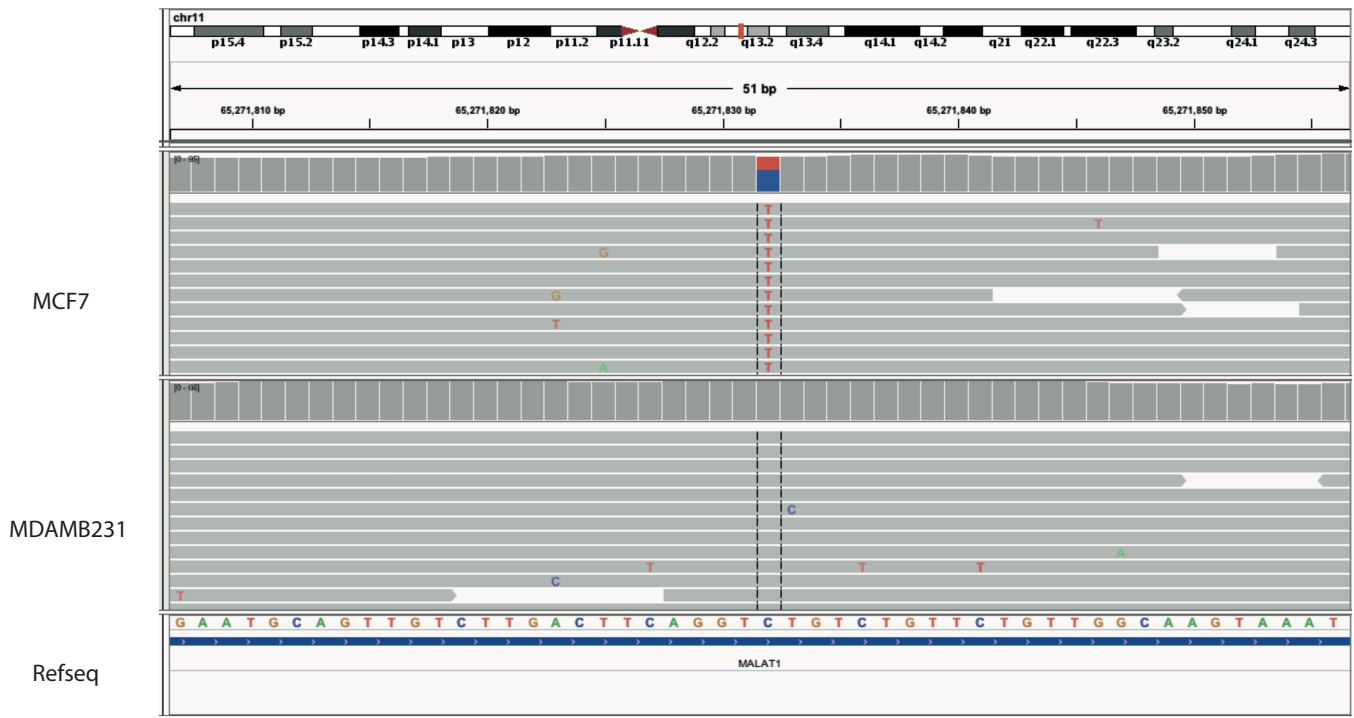

Figure S5

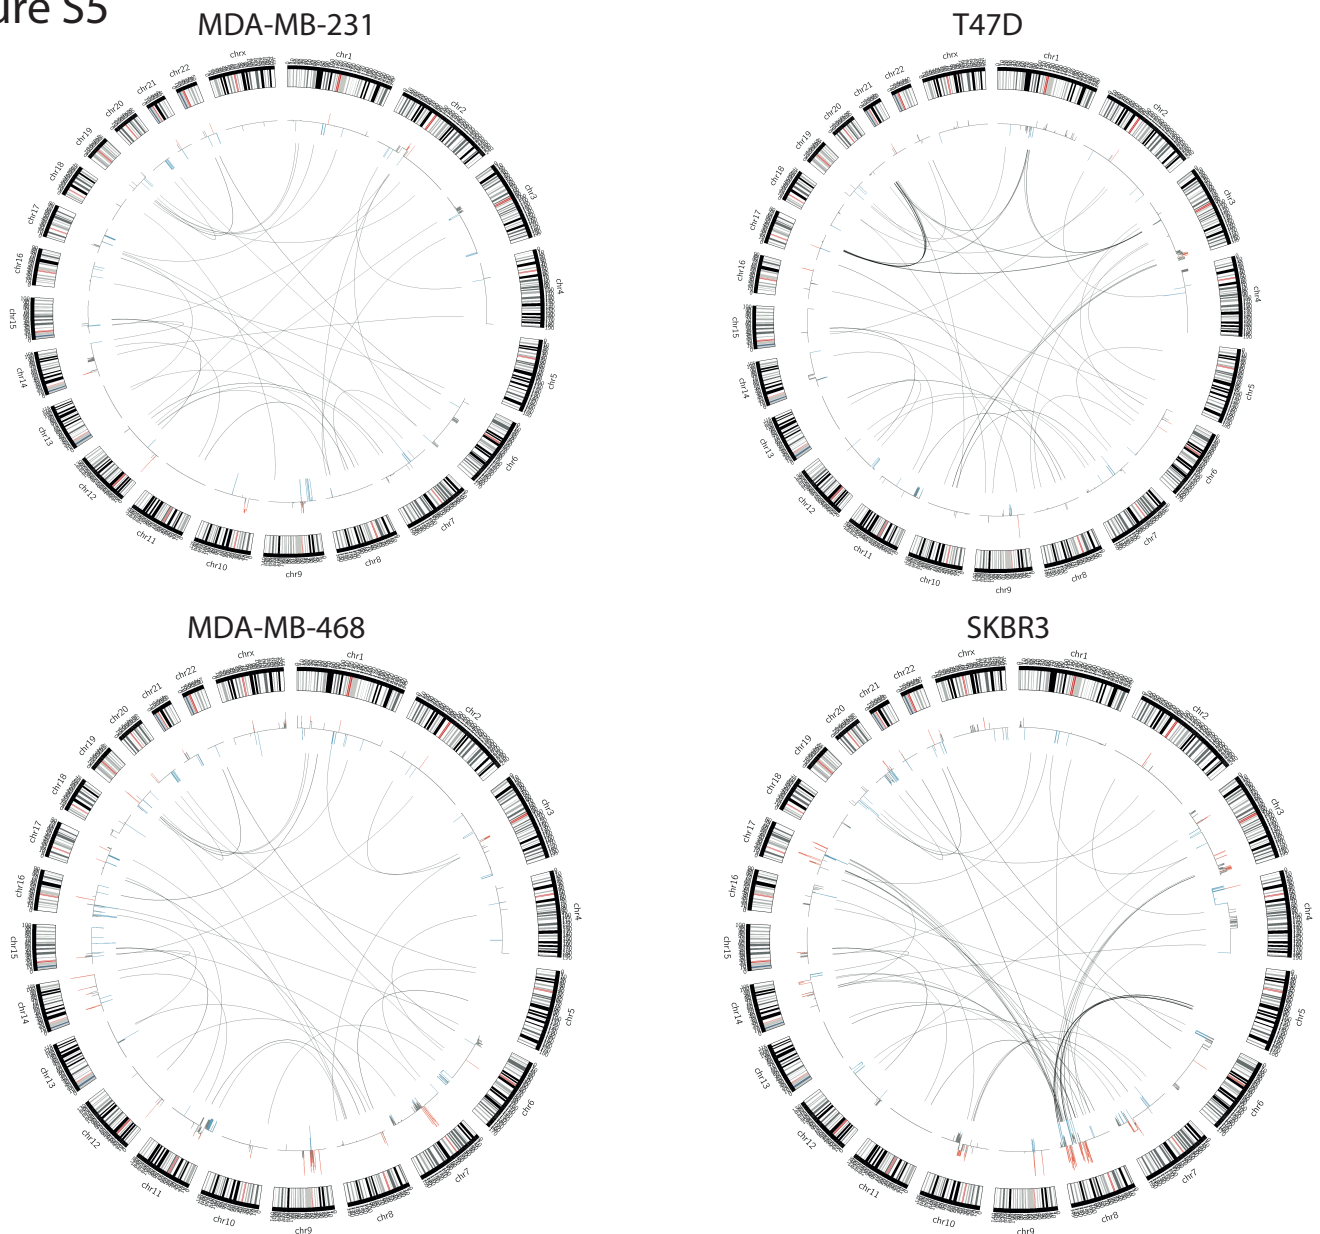

Figure S6

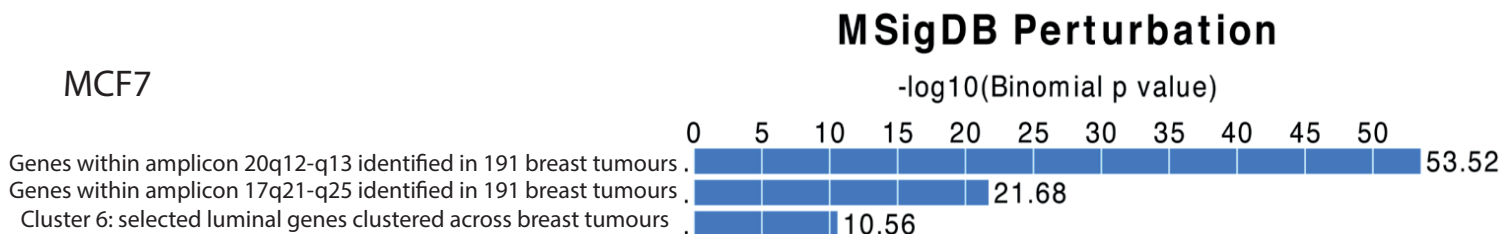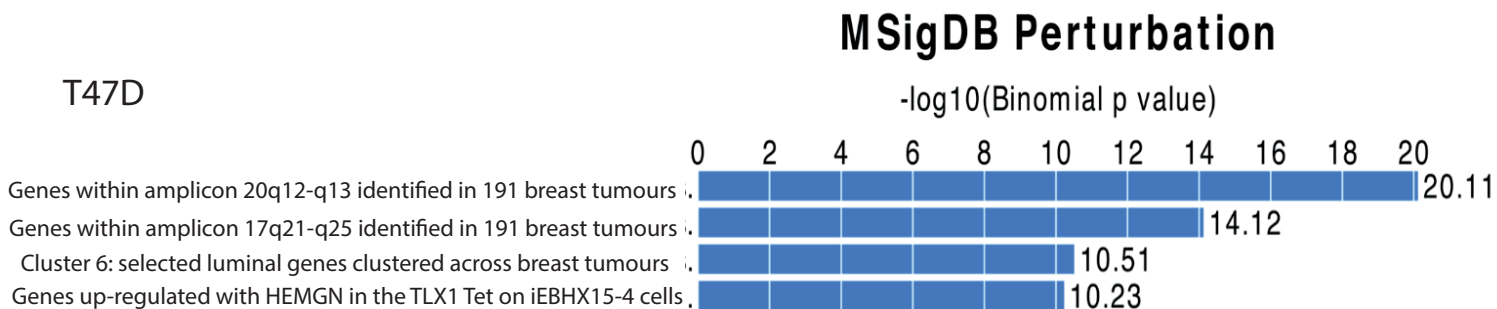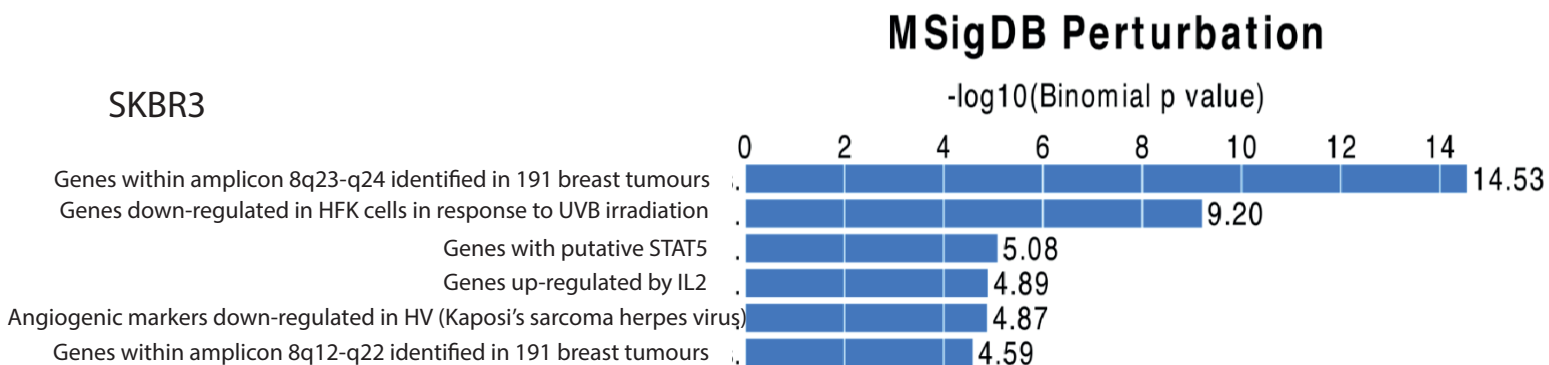

Figure S7

FOXA1 - 8 copies, focal amplification

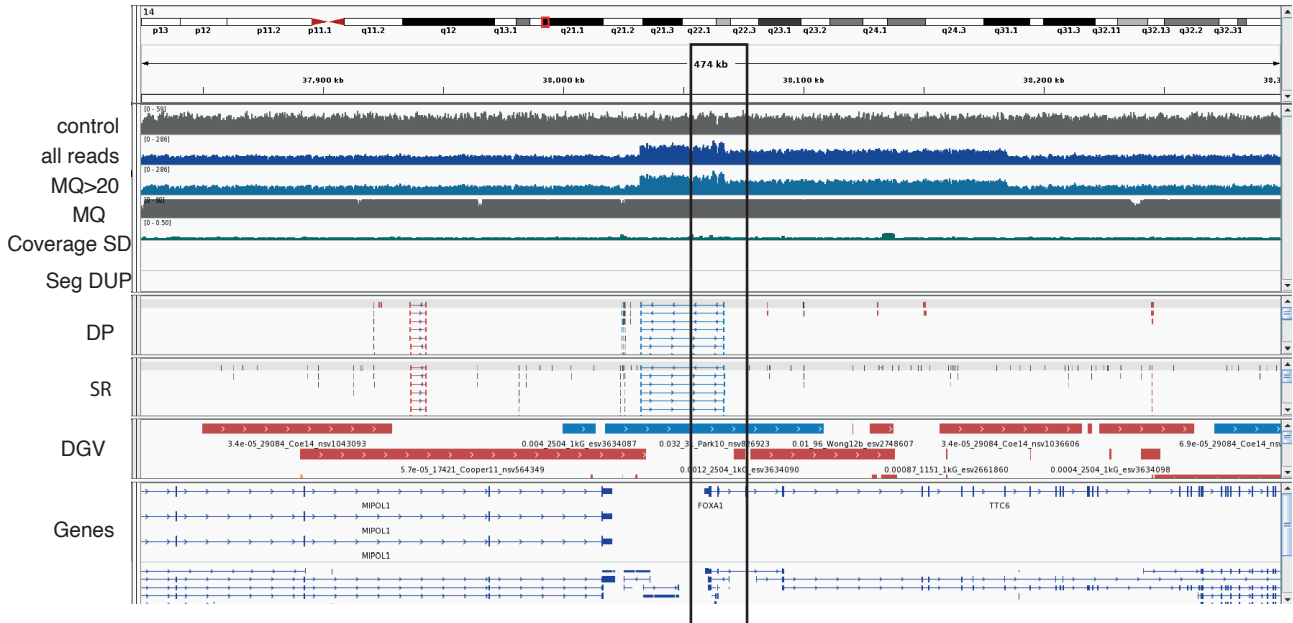

GATA3, broad gain, 4 copies

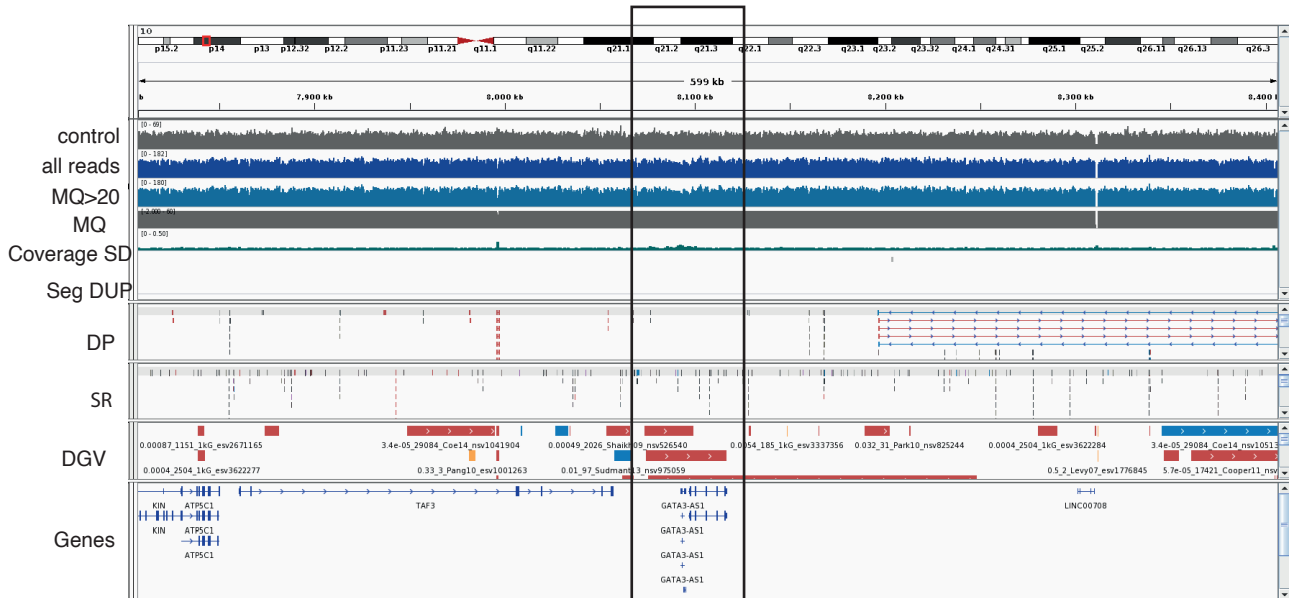

ESR1, partial gain

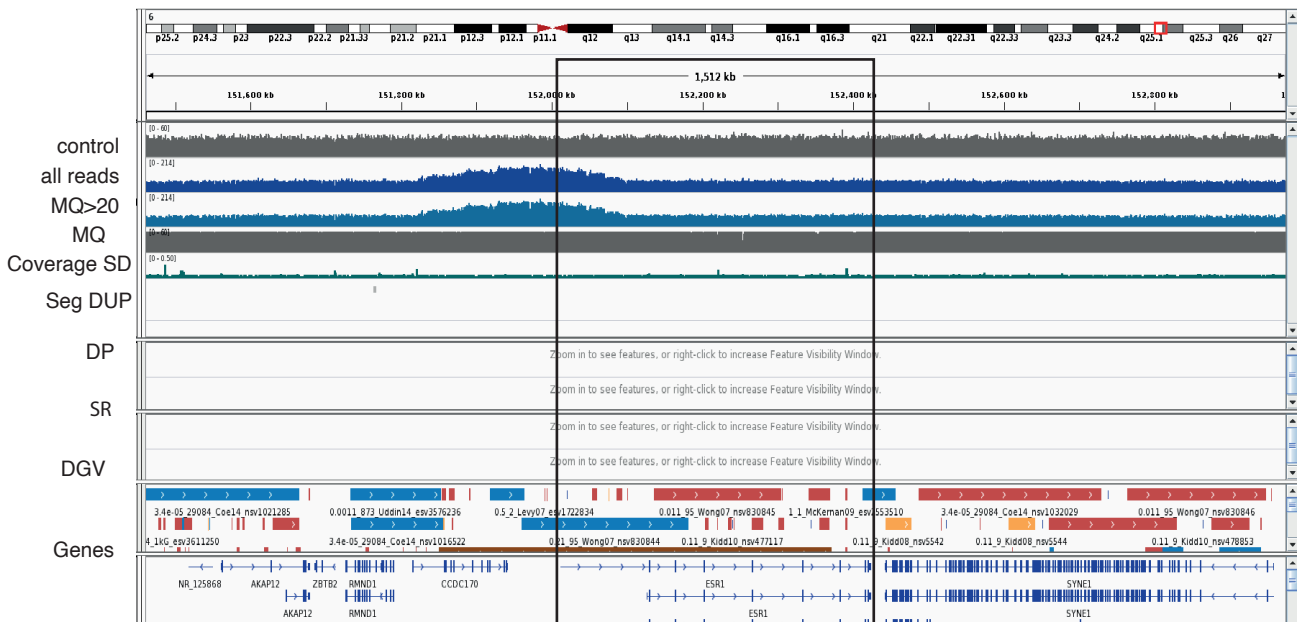

Figure S8

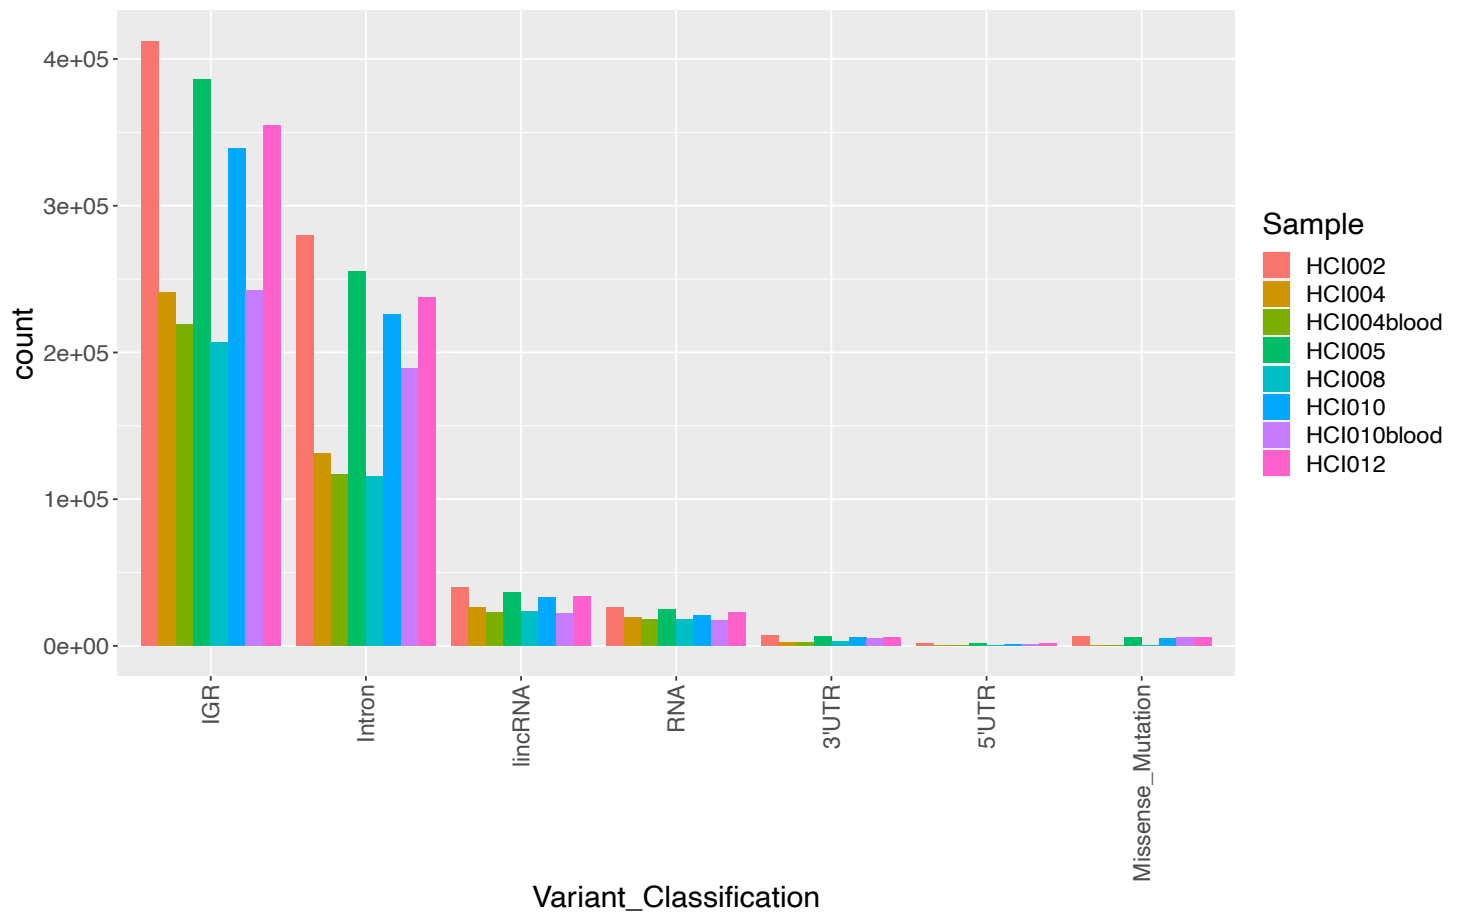

Figure S9

Survival of CSMD1 in METABRIC1 Basal (  $p = 0.834$  )

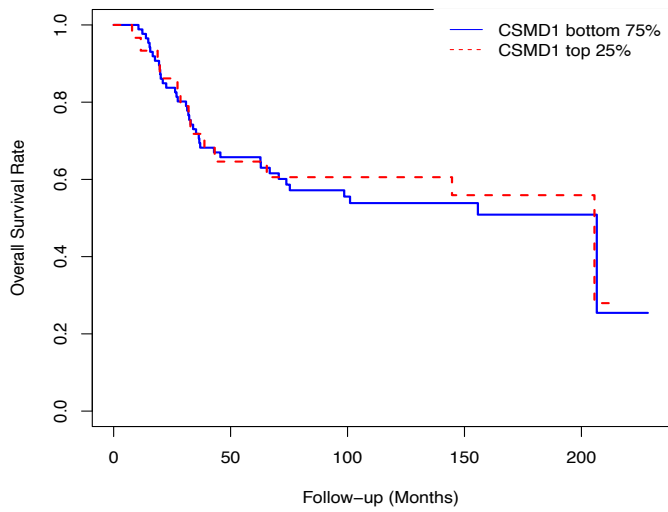

Survival of CSMD1 in METABRIC1 Her2 (  $p = 0.563$  )

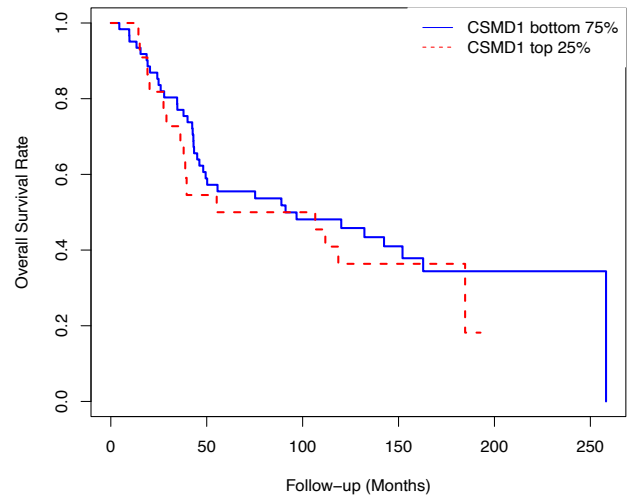

Survival of CSMD1 in METABRIC1 LumA (  $p = 0.0687$  )

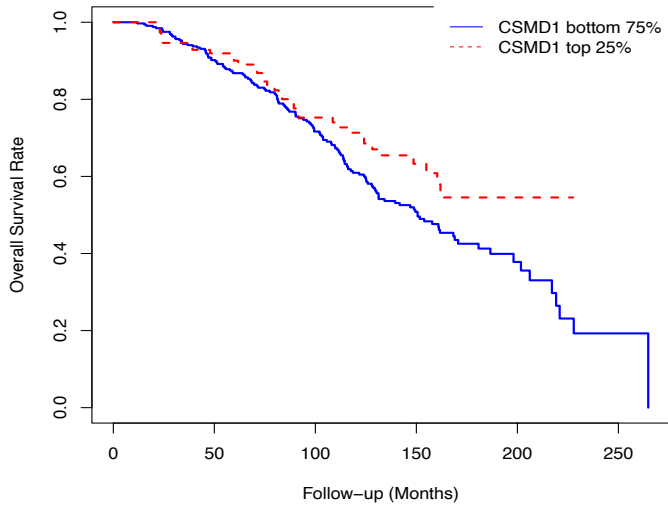

Survival of CSMD1 in METABRIC1 LumB (  $p = 0.000947$  )

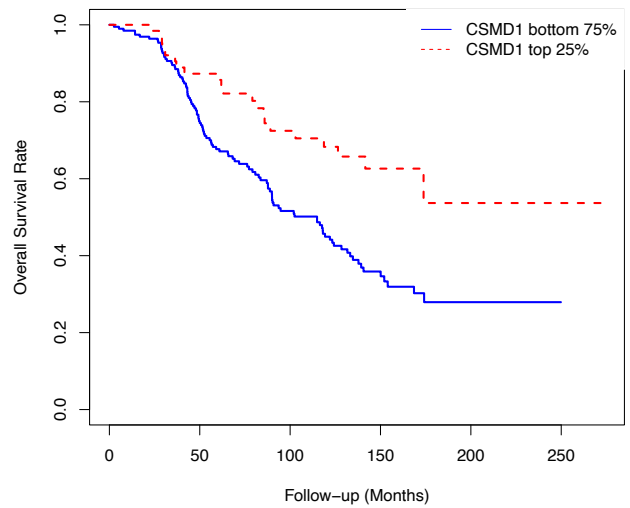

Supplement: 13058_2022_1540_MOESM1_ESM.pdf [file 13058_2022_1540_MOESM1_ESM.pdf]
